# Supplementary material
Source: Research Square preprint supplement (doi:10.21203/rs.3.rs-8684499/v1)
Supplement: Supplementary file 1 [file ebc029340bc60832d836a102.docx]

**Supplemental Table 1.** Subgroup analysis: numerical analysis of different drug treatments

| Characteristics | Sintilimab (N=2) | Pembrolizumab (N=8) | Tislelizumab (N=2) | Sugemalimab (N=2) |
| --- | --- | --- | --- | --- |
| Postoperative pathology results — no. (%) |  |  |  |  |
| pCR | 1 (50) | 5 (62) | 1 (50) | 2 (100) |
| MPR | 1 (50) | 0 (0) | 0 (0) | 0 (0) |
| Incomplete pathologic response | 0 (0) | 3 (38) | 1 (50) | 0 (0) |
| Number of metastatic lesions —no. (%) |  |  |  |  |
| 1 | 1 (50) | 7 (87) | 2 (100) | 1 (50) |
| 2 | 1 (50) | 1 (13) | 0 (0) | 1(50) |
| Extent of surgery — no. (%) |  |  |  |  |
| Lobectomy | 1 (50) | 5 (62) | 2 (100) | 2 (100) |
| Bilobectomy | 1 (50) | 3 (38) | 0 (0) | 0 (0) |
| Surgical method — no. (%) |  |  |  |  |
| VATS/da Vinci | 2 (100) | 7 (87) | 2 (100) | 2 (100) |
| Thoracotomy | 0 (0) | 1 (13) | 0 (0) | 0 (0) |

**Supplemental Table 2.** Surgical procedures

| Characteristics | Patients (n=14) |
| --- | --- |
| Extent of surgery — no. (%) |  |
| Lobectomy | 10 (71) |
| Bilobectomy | 4 (29) |
| Surgical method — no. (%) |  |
| VATS/RATS | 13 (93) |
| Thoracotomy | 1 (7) |
| Operation time (min) | 203.6 (30-440) |
| Bleeding (mL) | 403.6 (20-2500) |
| Hospital stays (days) | 7 (5-9) |
| Chest tube duration (days) | 4.5 (3-7) |
